# Supplementary material for: Synthesis and Rheological Characterization of a Novel Salecan Hydrogel
Source: MDPI journal article supplement (doi:10.3390/pharmaceutics14071492), 2022-07-18
Supplement: s1 [file s1]

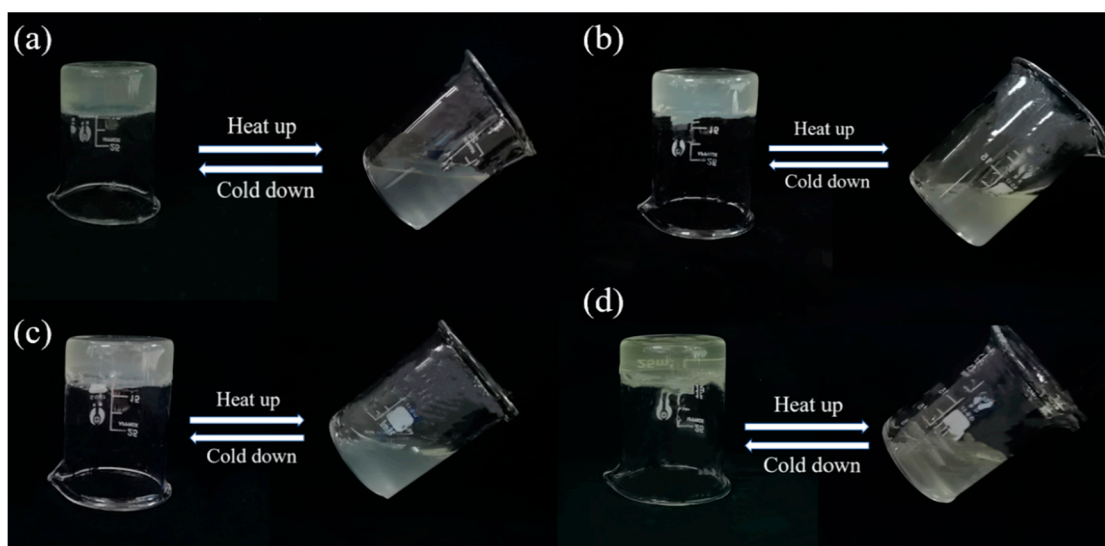

**Figure S1.** The thermally reversible conversion of Sal solution to hydrogel: (a) 3.5 wt% Sal hydrogel. (b) 5.0 wt% Sal hydrogel. (c) 6.5 wt% Sal hydrogel. (d) 8.0 wt% Sal hydrogel.
